# Supplementary material for: Survival prediction of patients with sepsis from age, sex, and septic episode number alone
Source: PubMed Central journal article supplement (PMC7555553; doi:10.1038/s41598-020-73558-3), 2020-10-13
Supplement: 41598_2020_73558_MOESM1_ESM.pdf [file 41598_2020_73558_MOESM1_ESM.pdf]

# Survival prediction of patients with sepsis from age, sex, and septic episode number alone

Davide Chicco<sup>1,\*</sup> and Giuseppe Jurman<sup>2</sup>

<sup>1,\*</sup> Krembil Research Institute, Toronto, Ontario, Canada

<sup>2</sup> Fondazione Bruno Kessler, Trento, Italy

\* [davidechicco@davidechicco.it](mailto:davidechicco@davidechicco.it)

Supplementary Information

545 **Supplementary Information**

546 **Binary statistical rates**

547 List of statistical rates and their formulas:

$$\text{MCC} = \frac{TP \cdot TN - FP \cdot FN}{\sqrt{(TP + FP) \cdot (TP + FN) \cdot (TN + FP) \cdot (TN + FN)}} \quad (1)$$

548 (worst value = -1; best value = +1)

$$F_1 \text{ score} = \frac{2 \cdot TP}{2 \cdot TP + FP + FN} \quad (2)$$

549 (worst value = 0; best value = 1)

$$\text{accuracy} = \frac{TP + TN}{TP + FN + TN + FP} \quad (3)$$

550 (worst value = 0; best value = 1)

$$\text{true positive rate (TP rate)} = \text{recall} = \text{sensitivity} = \frac{TP}{TP + FN} \quad (4)$$

551 (worst value = 0; best value = 1)

$$\text{true negative rate (TN rate)} = \text{specificity} = \frac{TN}{TN + FP} \quad (5)$$

552 (worst value = 0; best value = 1)

$$\text{positive predictive value (PPV)} = \text{precision} = \frac{TP}{TP + FP} \quad (6)$$

553 (worst value = 0; best value = 1)

$$\text{negative predictive value (NPV)} = \frac{TN}{TN + FN} \quad (7)$$

554 (worst value = 0; best value = 1)

$$\text{precision-recall (PR) AUC} = \begin{cases} \text{true positive rate} & \text{on the } x \text{ axis} \\ \text{precision} & \text{on the } y \text{ axis} \end{cases} \quad (8)$$

555 (worst value = 0; best value = 1)

$$\text{ROC AUC} = \begin{cases} \text{false positive rate} & \text{on the } x \text{ axis} \\ \text{true positive rate} & \text{on the } y \text{ axis} \end{cases} \quad (9)$$

556 (worst value = 0; best value = 1)

## Survival prediction results with standard deviation

| method                                | value    | PR AUC | ROC AUC | TP rate | TN rate | PPV   | NPV   | MCC   | F <sub>1</sub> score | accuracy |
|---------------------------------------|----------|--------|---------|---------|---------|-------|-------|-------|----------------------|----------|
| train and test on the primary cohort: |          |        |         |         |         |       |       |       |                      |          |
| Radial SVM                            | mean     | 0.966  | 0.701   | 0.492   | 0.807   | 0.97  | 0.112 | 0.157 | 0.652                | 0.515    |
| Radial SVM                            | $\sigma$ | 0.002  | 0.006   | 0.033   | 0.031   | 0.003 | 0.004 | 0.005 | 0.029                | 0.028    |
| Gradient boosting                     | mean     | 0.966  | 0.687   | 0.611   | 0.673   | 0.959 | 0.121 | 0.151 | 0.746                | 0.615    |
| Gradient boosting                     | $\sigma$ | 0.001  | 0.006   | 0.033   | 0.041   | 0.003 | 0.004 | 0.007 | 0.024                | 0.028    |
| Naive Bayes                           | mean     | 0.957  | 0.641   | 0.400   | 0.882   | 0.977 | 0.105 | 0.152 | 0.568                | 0.436    |
| Naive Bayes                           | $\sigma$ | 0.001  | 0.004   | 0.005   | 0.008   | 0.002 | 0.002 | 0.004 | 0.005                | 0.004    |
| Linear regression                     | mean     | 0.955  | 0.651   | 0.532   | 0.770   | 0.967 | 0.116 | 0.158 | 0.686                | 0.549    |
| Linear regression                     | $\sigma$ | 0.001  | 0.005   | 0.005   | 0.010   | 0.001 | 0.003 | 0.005 | 0.004                | 0.004    |
| Linear SVM                            | mean     | 0.968  | 0.706   | 0.325   | 0.933   | 0.984 | 0.099 | 0.146 | 0.489                | 0.370    |
| Linear SVM                            | $\sigma$ | 0.001  | 0.005   | 0.005   | 0.006   | 0.001 | 0.002 | 0.004 | 0.005                | 0.004    |
| train and test on the study cohort:   |          |        |         |         |         |       |       |       |                      |          |
| Linear SVM                            | mean     | 0.860  | 0.586   | 0.205   | 0.898   | 0.896 | 0.210 | 0.104 | 0.333                | 0.337    |
| Linear SVM                            | $\sigma$ | 0.007  | 0.010   | 0.022   | 0.021   | 0.013 | 0.008 | 0.013 | 0.028                | 0.016    |
| Radial SVM                            | mean     | 0.858  | 0.586   | 0.408   | 0.718   | 0.861 | 0.222 | 0.102 | 0.553                | 0.467    |
| Radial SVM                            | $\sigma$ | 0.007  | 0.010   | 0.031   | 0.034   | 0.010 | 0.009 | 0.014 | 0.028                | 0.020    |
| Gradient boosting                     | mean     | 0.856  | 0.574   | 0.517   | 0.595   | 0.847 | 0.225 | 0.090 | 0.635                | 0.532    |
| Gradient boosting                     | $\sigma$ | 0.006  | 0.011   | 0.103   | 0.112   | 0.015 | 0.010 | 0.019 | 0.083                | 0.063    |
| Naive Bayes                           | mean     | 0.844  | 0.559   | 0.294   | 0.823   | 0.877 | 0.214 | 0.104 | 0.440                | 0.394    |
| Naive Bayes                           | $\sigma$ | 0.006  | 0.007   | 0.012   | 0.017   | 0.009 | 0.008 | 0.013 | 0.014                | 0.009    |
| Linear regression                     | mean     | 0.841  | 0.565   | 0.470   | 0.661   | 0.856 | 0.225 | 0.103 | 0.606                | 0.506    |
| Linear regression                     | $\sigma$ | 0.007  | 0.009   | 0.010   | 0.017   | 0.008 | 0.009 | 0.014 | 0.009                | 0.008    |

**Table S1. Results of the survival prediction made with machine learning classifiers, including standard deviation, with training phase and testing phase done on the Norwegian primary cohort and study cohort.** Mean results of 100 executions with random selection of the elements in the training set and test set, with ROSE oversampling applied to the training set. In this analysis, both the training phase and the testing phase happened on the primary cohort or on the study cohort, respectively.  $\sigma$ : standard deviation. Admissions of survived patients: positives data instances (class 1). Admissions of deceased patients: negative data instances (class 0). Linear SVM: support vector machine with linear kernel. Optimized cost regularization hyper-parameter of the linear SVM, most frequently selected  $C$  by the MCC-based grid search:  $C = 0.01$  for primary cohort (63 times out of 100) and  $C = 0.001$  for study cohort (51 times out of 100). Radial SVM: support vector machine with radial Gaussian kernel. Optimized cost regularization of the radial SVM, most frequently selected  $C$  by the MCC-based grid search:  $C = 0.1$  for the primary cohort (56 times out of 100) and for the study cohort (51 times out of 100). MCC: Matthews correlation coefficient. MCC worst value =  $-1$  and best value =  $+1$ . TP rate: true positive rate, sensitivity, recall. TN rate: true negative rate, specificity. PR: precision-recall curve. PPV: positive predictive value, precision. NPV: negative predictive value. ROC: receiver operating characteristic curve. AUC: area under the curve. F<sub>1</sub> score, accuracy, TP rate, TN rate, PPV, NPV, PR AUC, ROC AUC: worst value = 0 and best value =  $+1$ . ROSE minority class probability:  $p = 0.5$  for SVMs;  $p = 0.38$  for gradient boosting, naïve Bayes, and linear regression in the primary cohort;  $p = 0.45$  for gradient boosting, naïve Bayes, and linear regression in the study cohort. each statistical indicator.

| train and test on the validation cohort: |          |        |         |         |         |       |       |        |                      |          |
|------------------------------------------|----------|--------|---------|---------|---------|-------|-------|--------|----------------------|----------|
| method                                   | value    | PR AUC | ROC AUC | TP rate | TN rate | PPV   | NPV   | MCC    | F <sub>1</sub> score | accuracy |
| Linear SVM                               | mean     | 0.899  | 0.676   | 0.911   | 0.388   | 0.873 | 0.490 | +0.309 | 0.889                | 0.818    |
| Linear SVM                               | $\sigma$ | 0.071  | 0.165   | 0.080   | 0.265   | 0.069 | 0.257 | +0.261 | 0.059                | 0.084    |
| Naïve Bayes                              | mean     | 0.887  | 0.713   | 0.899   | 0.527   | 0.891 | 0.538 | +0.417 | 0.893                | 0.828    |
| Naïve Bayes                              | $\sigma$ | 0.064  | 0.116   | 0.061   | 0.226   | 0.064 | 0.216 | +0.200 | 0.048                | 0.069    |
| Gradient boosting                        | mean     | 0.883  | 0.682   | 0.912   | 0.448   | 0.885 | 0.540 | +0.378 | 0.895                | 0.828    |
| Gradient boosting                        | $\sigma$ | 0.071  | 0.126   | 0.066   | 0.233   | 0.063 | 0.264 | +0.219 | 0.044                | 0.064    |
| Linear regression                        | mean     | 0.880  | 0.689   | 0.849   | 0.530   | 0.885 | 0.458 | +0.350 | 0.863                | 0.788    |
| Linear regression                        | $\sigma$ | 0.071  | 0.126   | 0.101   | 0.237   | 0.072 | 0.213 | +0.213 | 0.071                | 0.096    |
| Radial SVM                               | mean     | 0.873  | 0.642   | 0.929   | 0.226   | 0.849 | 0.465 | +0.179 | 0.883                | 0.806    |
| Radial SVM                               | $\sigma$ | 0.087  | 0.176   | 0.100   | 0.234   | 0.070 | 0.277 | +0.234 | 0.072                | 0.092    |

**Table S2. Results of the survival prediction made with machine learning classifiers, including standard deviation, on the South Korean external validation cohort.** Mean results of 100 executions with random selection of the elements in the training set and test set, with ROSE oversampling applied to the training set. In this analysis, both the training phase and the testing phase happened on the validation cohort.  $\sigma$ : standard deviation. Admissions of survived patients: positives data instances (class 1). Admissions of deceased patients: negative data instances (class 0). Linear SVM: support vector machine with linear kernel. Optimized cost regularization hyper-parameter of the linear SVM, most frequently selected C by the MCC-based grid search:  $C = 0.1$  (59 times out of 100). Radial SVM: support vector machine with radial Gaussian kernel. Optimized cost regularization of the radial SVM, most frequently selected C by the MCC-based grid search:  $C = 0.1$  (70 times out of 100). MCC: Matthews correlation coefficient. MCC worst value =  $-1$  and best value =  $+1$ . TP rate: true positive rate, sensitivity, recall. TN rate: true negative rate, specificity. PR: precision-recall curve. PPV: positive predictive value, precision. NPV: negative predictive value. ROC: receiver operating characteristic curve. AUC: area under the curve. F<sub>1</sub> score, accuracy, TP rate, TN rate, PPV, NPV, PR AUC, ROC AUC: worst value = 0 and best value =  $+1$ . ROSE  $p$ -value: 0.5 for all.

| method                                                 | value    | PR AUC | ROC AUC | TP rate | TN rate | PPV   | NPV   | MCC    | F <sub>1</sub> score | accuracy |
|--------------------------------------------------------|----------|--------|---------|---------|---------|-------|-------|--------|----------------------|----------|
| train on primary cohort and test on validation cohort: |          |        |         |         |         |       |       |        |                      |          |
| Naïve Bayes                                            | mean     | 0.848  | 0.565   | 0.715   | 0.415   | 0.852 | 0.236 | +0.107 | 0.777                | 0.663    |
| Naïve Bayes                                            | $\sigma$ | 0.005  | 0.013   | 0.020   | 0.030   | 0.006 | 0.013 | +0.022 | 0.012                | 0.014    |
| Gradient boosting                                      | mean     | 0.843  | 0.527   | 0.953   | 0.035   | 0.823 | 0.123 | -0.018 | 0.882                | 0.792    |
| Gradient boosting                                      | $\sigma$ | 0.009  | 0.018   | 0.060   | 0.058   | 0.006 | 0.077 | +0.044 | 0.028                | 0.042    |
| Radial SVM                                             | mean     | 0.821  | 0.514   | 0.949   | 0.013   | 0.819 | 0.040 | -0.068 | 0.879                | 0.785    |
| Radial SVM                                             | $\sigma$ | 0.019  | 0.036   | 0.032   | 0.031   | 0.006 | 0.093 | +0.058 | 0.016                | 0.026    |
| 0.000                                                  | -0.087   | 0.883  | 0.790   |         |         |       |       |        |                      |          |
|                                                        | 0.000    | +0.009 | 0.004   | 0.007   |         |       |       |        |                      |          |
| train on study cohort and test on validation cohort:   |          |        |         |         |         |       |       |        |                      |          |
| Gradient boosting                                      | mean     | 0.863  | 0.552   | 0.973   | 0.061   | 0.830 | 0.739 | +0.130 | 0.895                | 0.814    |
| Gradient boosting                                      | $\sigma$ | 0.017  | 0.029   | 0.045   | 0.038   | 0.007 | 0.392 | +0.124 | 0.022                | 0.035    |
| Naïve Bayes                                            | mean     | 0.848  | 0.566   | 0.747   | 0.386   | 0.851 | 0.244 | +0.113 | 0.795                | 0.683    |
| Naïve Bayes                                            | $\sigma$ | 0.002  | 0.007   | 0.007   | 0.019   | 0.003 | 0.005 | +0.011 | 0.004                | 0.004    |
| Radial SVM                                             | mean     | 0.829  | 0.537   | 0.955   | 0.011   | 0.820 | 0.043 | -0.068 | 0.882                | 0.789    |
| Radial SVM                                             | $\sigma$ | 0.007  | 0.012   | 0.008   | 0.023   | 0.004 | 0.087 | +0.047 | 0.005                | 0.008    |
| Linear regression                                      | mean     | 0.824  | 0.499   | 0.956   | 0.042   | 0.824 | 0.166 | -0.005 | 0.885                | 0.796    |
| Linear regression                                      | $\sigma$ | 0.000  | 0.000   | 0.001   | 0.000   | 0.000 | 0.002 | +0.001 | 0.000                | 0.001    |

**Table S3. Results of the survival prediction made with machine learning classifiers, including standard deviation, with training phase done on the Norwegian primary cohort or study cohort and testing phase done on the South Korean external validation cohort.** Mean results of 100 executions with random selection of the elements in the training set and test set, with ROSE oversampling applied to the training set.  $\sigma$ : standard deviation. Admissions of survived patients: positives data instances (class 1). Admissions of deceased patients: negative data instances (class 0). Linear SVM: support vector machine with linear kernel. Optimized cost regularization hyper-parameter of the linear SVM, most frequently selected C by the MCC-based grid search:  $C = 0.01$  for primary cohort (63 times out of 100) and  $C = 0.001$  for study cohort (51 times out of 100). Radial SVM: support vector machine with radial Gaussian kernel. Optimized cost regularization of the radial SVM, most frequently selected C by the MCC-based grid search:  $C = 0.1$  for the primary cohort (56 times out of 100) and for the study cohort (51 times out of 100). MCC: Matthews correlation coefficient. MCC worst value =  $-1$  and best value =  $+1$ . TP rate: true positive rate, sensitivity, recall. TN rate: true negative rate, specificity. PR: precision-recall curve. PPV: positive predictive value, precision. NPV: negative predictive value. ROC: receiver operating characteristic curve. AUC: area under the curve. F<sub>1</sub> score, accuracy, TP rate, TN rate, PPV, NPV, PR AUC, ROC AUC: worst value = 0 and best value =  $+1$ . ROSE minority class probability:  $p = 0.5$  for SVMs;  $p = 0.38$  for gradient boosting, naïve Bayes, and linear regression in the primary cohort;  $p = 0.45$  for gradient boosting, naïve Bayes, and linear regression in the study cohort. We did not report the results of linear regression trained on the primary cohort and the results of the linear SVM on both the cohorts because these methods predicted all positives in the validation cohort. each statistical indicator.
